# Supplementary material for: Efficient all-fluorescence white organic light-emitting diodes with superior color stability and low efficiency roll-off employing matrix-free blue emitting layers
Source: Royal Society of Chemistry journal article supplement (doi:10.1039/d4tc01413h), 2024-01-01
Supplement: d4tc01413h1.pdf [file d4tc01413h1.pdf]

## Supporting Information

# Efficient all-fluorescence white organic light-emitting diodes with superior color stability and low efficiency roll-off employing matrix-free blue emitting layers

Yuan Liu<sup>a\*</sup>, Rui Xue<sup>a</sup>, Deng-Feng Li<sup>a</sup>, Ya-Nan Li<sup>a</sup>, Yuan-Bo Zhang<sup>a</sup>, Sheng-Zhe Huang<sup>a</sup>, Chun-Fang Zhang<sup>a</sup>, Qi Feng<sup>a</sup>, Tian-Yi Li<sup>b\*</sup>, Lin-Song Cui<sup>cd\*</sup>

<sup>a</sup>*Key Laboratory of the Ministry of Education for Optoelectronic Measurement Technology and Instrument, Beijing Information Science & Technology University, No.12 xiaoying East Road, Beijing, 100192, China*

<sup>b</sup>*School of Chemistry and Biological Engineering, Department of Chemistry, University of Science and Technology Beijing, 30 Xueyuan Road, Beijing, 100083, China*

<sup>c</sup>*Key Laboratory of Precision and Intelligent Chemistry, University of Science and Technology of China, Hefei, Anhui, 230026, China.*

<sup>d</sup>*CAS Key Laboratory of Soft Matter Chemistry, Department of Polymer Science and Engineering, University of Science and Technology of China, Hefei, Anhui, 230026, China*

**Table S1. Performance of monochrome OLEDs**

| Device | V <sup>a)</sup><br>(V) | EQE <sup>b)</sup><br>[%] | CE <sup>b)</sup><br>[cd A <sup>-1</sup> ] | PE <sup>b)</sup><br>[lm W <sup>-1</sup> ] | CIE <sup>c)</sup> |
|--------|------------------------|--------------------------|-------------------------------------------|-------------------------------------------|-------------------|
| 1      | 3.5                    | 14.0/13.2/6.9            | 29.1/27.2/14.2                            | 29.5/24.4/9.3                             | (0.183,0.310)     |
| 2      | 3.7                    | 22.8/20.7/18.7           | 56.1/50.7/46.0                            | 62.9/43.1/30.8                            | (0.482,0.506)     |
| 3      | 4.1                    | 16.2/11.2/7.3            | 23.1/16.2/10.4                            | 25.1/12.4/5.1                             | (0.625,0.368)     |
| 4      | 3.9                    | 7.0/6.1/4.2              | 11.5/10.3/7.4                             | 11.1/8.3/4.2                              | (0.532,0.398)     |
| 5      | 3.6                    | 14.5/12.3/8.4            | 37.7/32.3/21.5                            | 35.9/28.2/13.8                            | (0.271,0.435)     |

a) At a luminance of 100 cd m<sup>-2</sup>. b) Efficiencies of the maximum, at 100 cd m<sup>-2</sup> and at 1000 cd m<sup>-2</sup>. c) At a luminance of 100 cd m<sup>-2</sup>.

### 1. Comparison of matrix-free and doped EMLs of DMAC-DPS

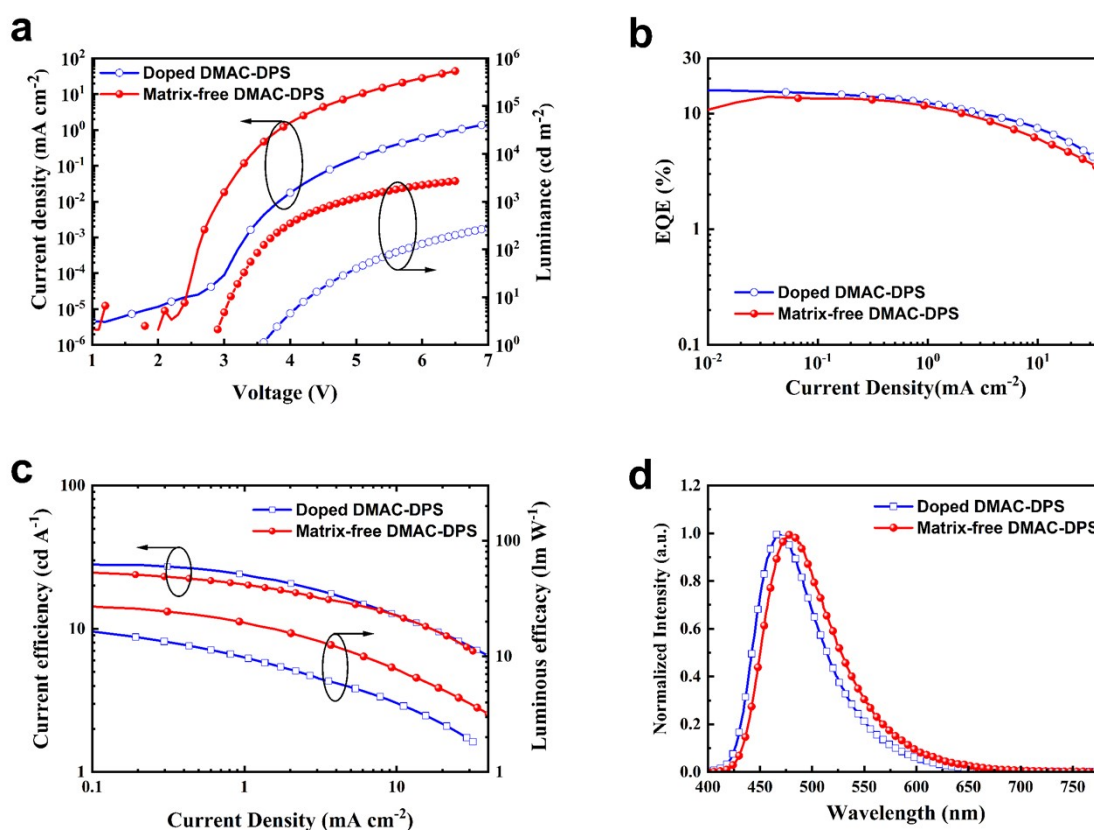

**Figure S1.** (a) Current density-voltage-luminance curves of blue devices based on matrix-free DMAC-DPS and doped DMAC-DPS; (b) EQE-Current density characteristics of blue OLEDs. (c) Current efficiency and luminous efficacy versus current density curves of blue OLEDs; (d) EL spectra of blue OLEDs at a luminance of 100 cd m<sup>-2</sup>.

The doped OLED architecture is ITO/HAT-CN (5 nm)/TAPC (40 nm)/TCTA (10 nm)/mCBP (5 nm)/DPEPO:DMAC-DPS(25 nm)/PPF(10 nm)/PBPPhen (40 nm)/Liq (2 nm)/Al (150 nm). As shown in Figure S1, the matrix-free blue OLED shows lower driving voltage than the doped device, which can be attributed to a lower bandgap of DMAC-DPS than that of DPEPO. In the doped OLEDs, the recombine processes take place on the high bandgap host material DPEPO and DMAC-DPS simultaneously, while in the matrix-free device, the recombination occurs directly on DMAC-DPS. Therefore, the doped OLED needs higher driving voltages than the matrix-free one. The lower driving voltage is beneficial for luminance efficacy. As shown in Figure S1c, the matrix-free device demonstrates higher luminance efficacy than the doped one. The matrix-free blue OLED EL emission peaked at 478 nm, which is a slight red-shift compared to the doped devices (468 nm). This is consistent with the reported values.<sup>1,2</sup>

## 2. Absorption of DBP and emission spectra of *t*BuCzDBA and DMAC-DPS

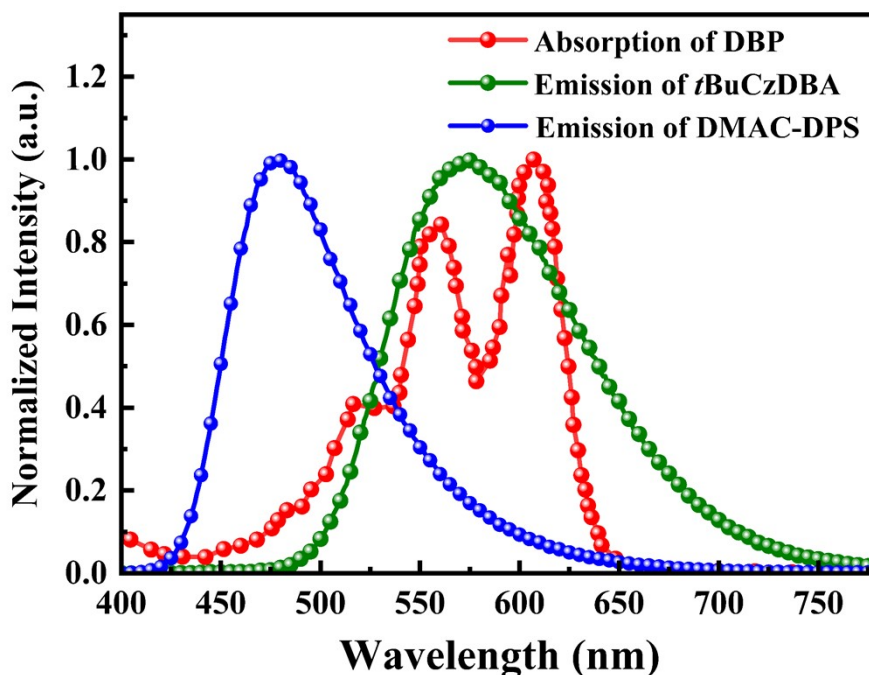

**Figure S2.** The absorption spectrum of DBP and emission spectra of *t*BuCzDBA and DMAC-DPS.

## 3. Device architecture of WOLEDs and molecular structures of adopted materials.

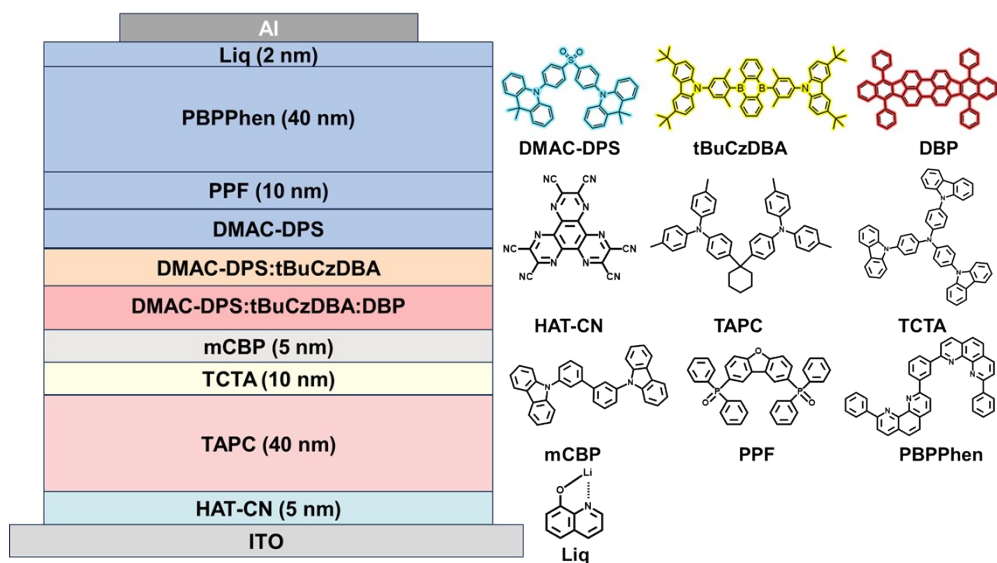

**Figure S3.** Device architecture of WOLEDs and molecular structures of adopted materials.

#### 4. EL spectra of WOLED W3

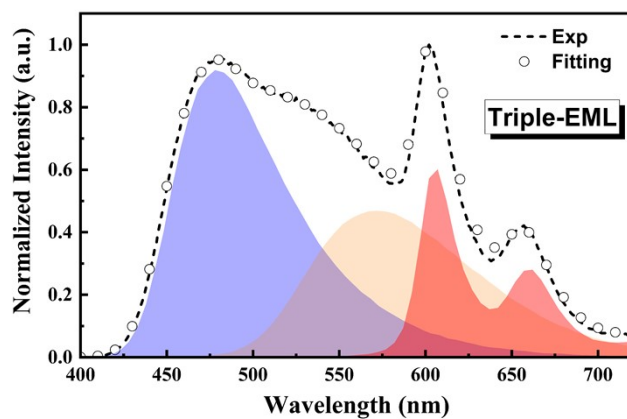

**Figure S4.** Experimental and fitting EL spectra of device W3.

#### 5. EL spectra of blue OLEDs

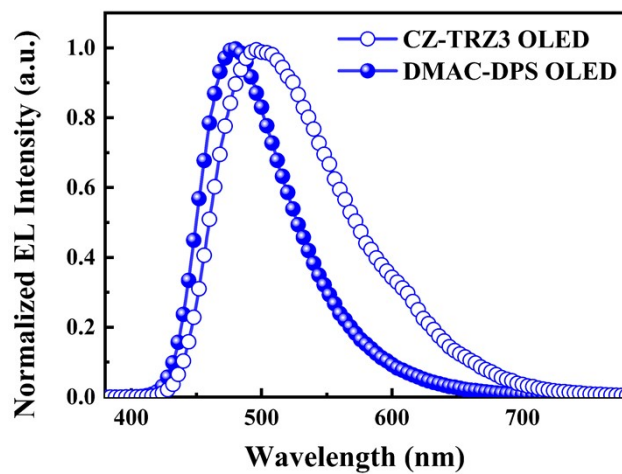

**Figure S5.** EL spectra of Cz-TRZ3 and DMAC-DPS based blue OLEDs.

6. The CIE coordinated of device W4 change with luminance.

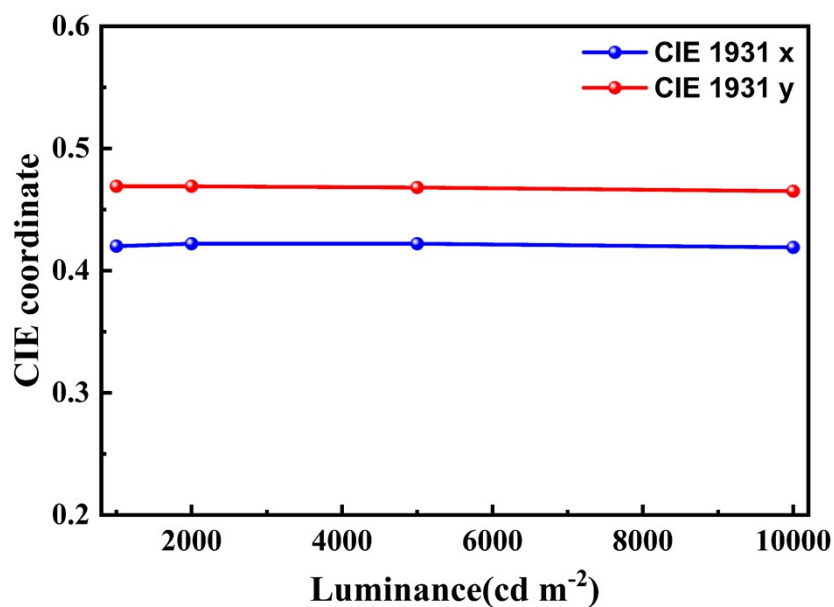

**Figure S6.** The CIE coordinates of Device W4 as a function of luminance.

1. H. H. Cho, D. G. Congrave, A. J. Gillett, S. Montanaro, H. E. Francis, V. Riesgo-Gonzalez, J. Ye, R. Chowdury, W. Zeng, M. K. Etherington, J. Royakkers, O. Millington, A. D. Bond, F. Plasser, J. M. Frost, C. P. Grey, A. Rao, R. H. Friend, N. C. Greenham and H. Bronstein, *Nat. Mater.*, 2024, **23**, 519-526.
2. Q. Zhang, D. Tsang, H. Kuwabara, Y. Hatae, B. Li, T. Takahashi, S. Y. Lee, T. Yasuda and C. Adachi, *Adv. Mater.*, 2015, **27**, 2096-2100.
